# Supplementary material for: Shh and p50/Bcl3 signaling crosstalk drives pathogenesis of BCCs in gorlin syndrome
Source: PubMed Central journal article supplement (PMC4742211; doi:10.18632/oncotarget.5103), 2015-09-15
Supplement: oncotarget-06-36789-s001.pdf [file oncotarget-06-36789-s001.pdf]

## SUPPLEMENTARY FIGURES

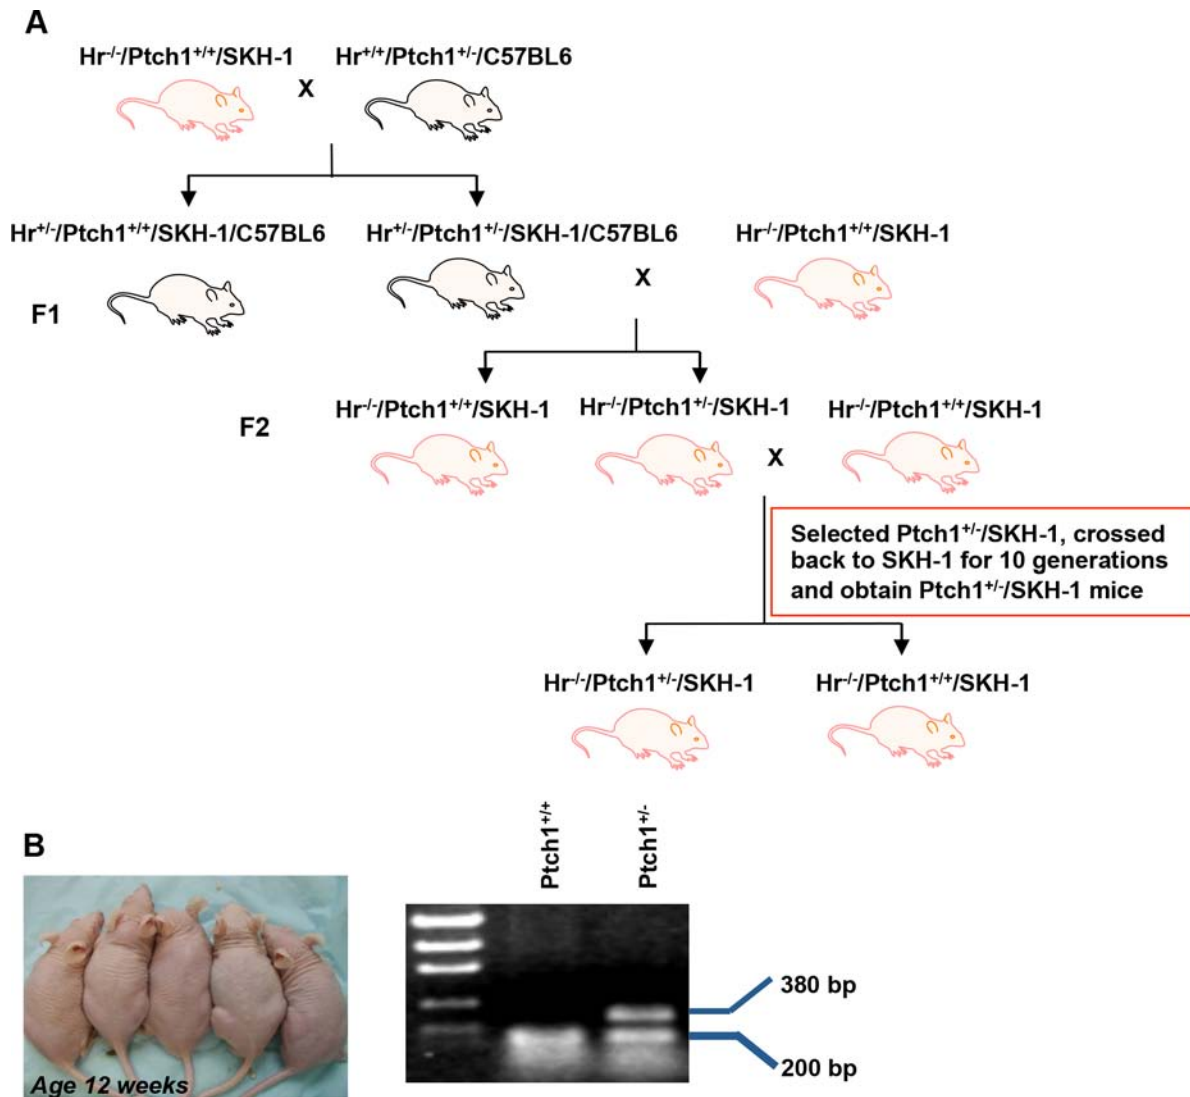

**Supplementary Figure S1: Breeding scheme for the generation of *Ptch1* heterozygous (*Ptch1*<sup>+/-</sup>) SKH-1 mice.** **A.** Male *Ptch1*<sup>+/-</sup>/*C57BL/6* mice were crossed with female SKH-1 hairless mice to obtain *Ptch1*<sup>+/-</sup>/*SKH-1/C57BL/6* mice. The male littermates of *Ptch1*<sup>+/-</sup>/*SKH-1/C57BL/6* were further bred with female SKH-1 animals for more than 10 generations to generate *Ptch1*<sup>+/-</sup>/*SKH-1* mice of hairless genetic background. **B.** Tail skin DNA was subjected to PCR analysis for genotyping of these animals.

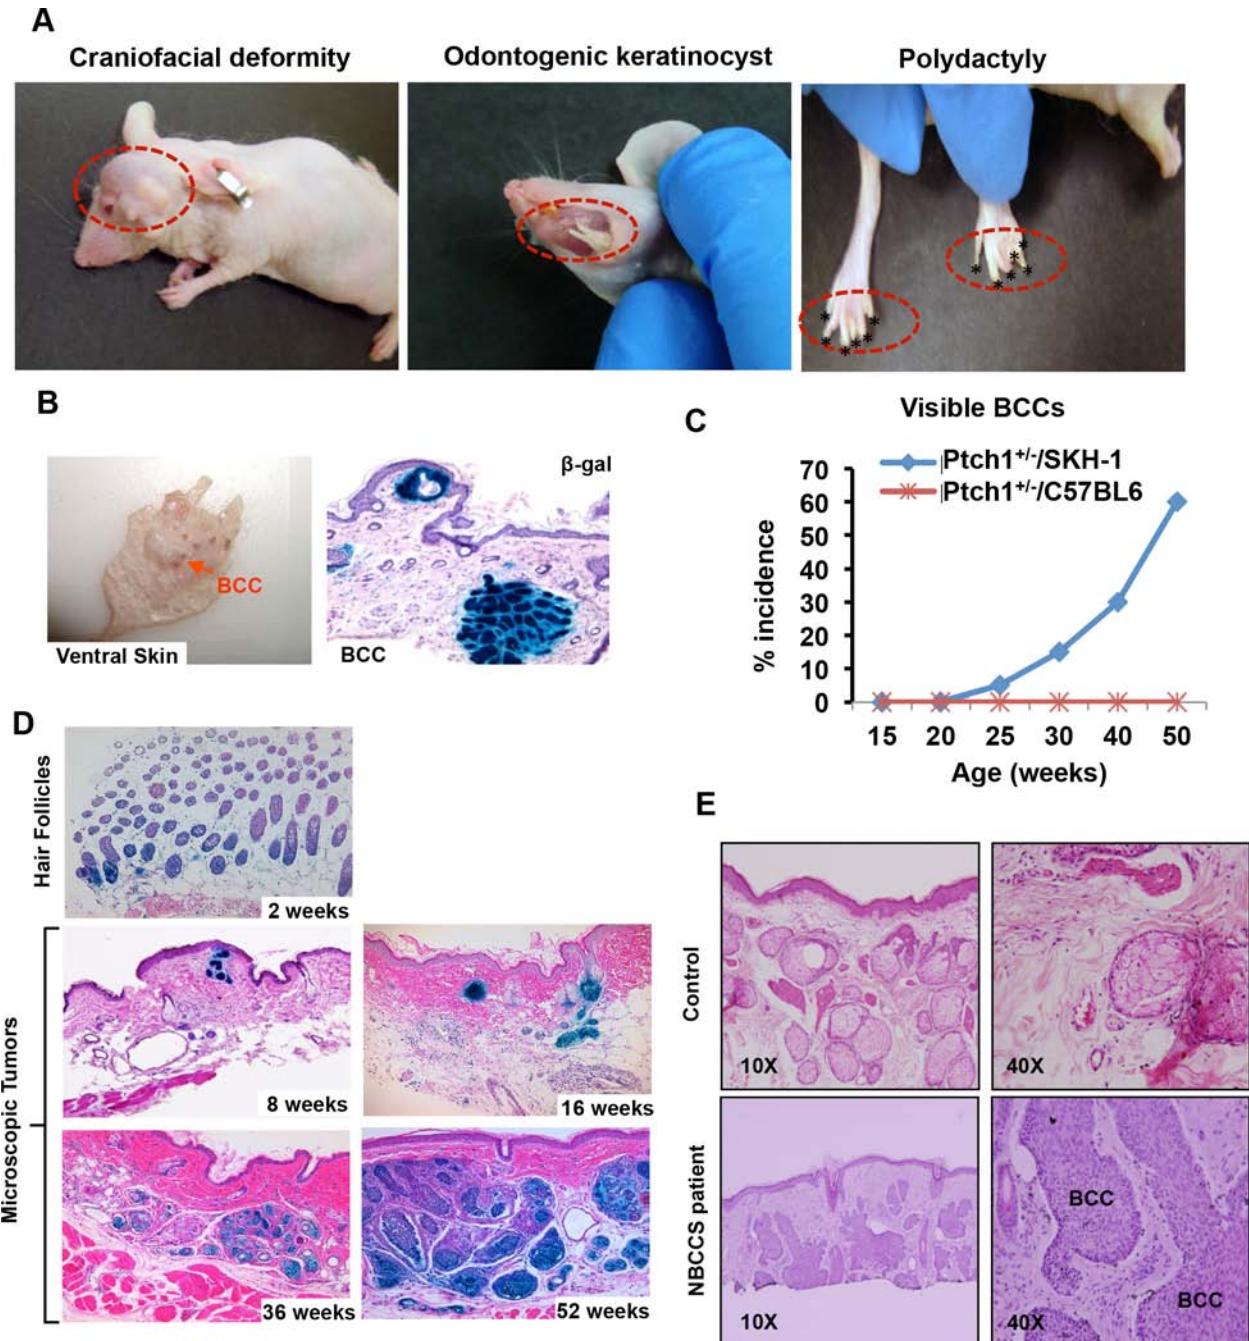

**Supplementary Figure S2: Phenotypic abnormalities, and development of spontaneous macroscopic and microscopic BCCs in  $Ptch1^{+/-}/SKH-1$  mice.** **A.** Phenotypic abnormalities observed in  $Ptch1^{+/-}/SKH-1$  mice showing, craniofacial abnormalities, odontogenic keratinocyst and polydactyly. **B.** Spontaneously BCCs on ventral skin of  $Ptch1^{+/-}/SKH-1$  mouse. **C.** Percentage incidence of spontaneous BCCs in  $Ptch1^{+/-}/SKH-1$  mice and **D.**  $\beta$ -gal staining showing growth of spontaneous microscopic BCCs in different age groups. **E.** H&E staining showing presence of BCCs in patients with NBCCS.

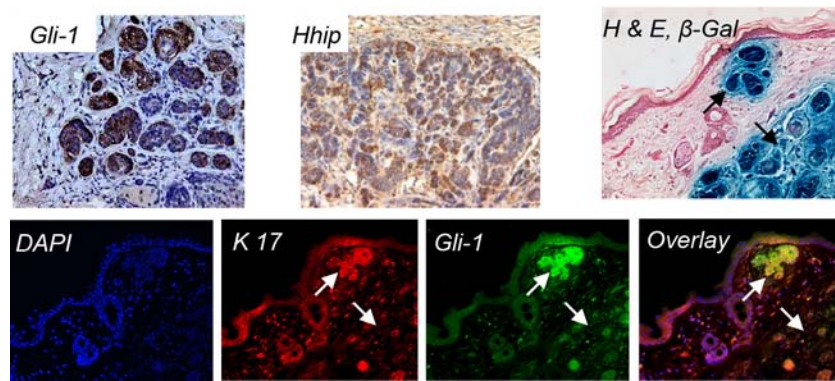

**Supplementary Figure S3: Immunostaining showing expression of BCC biomarkers Gli-1, Hhip and co-expression of K17 and Gli-1 in spontaneous BCCs in *Ptch1*<sup>+/-</sup>/SKH-1 mice.**

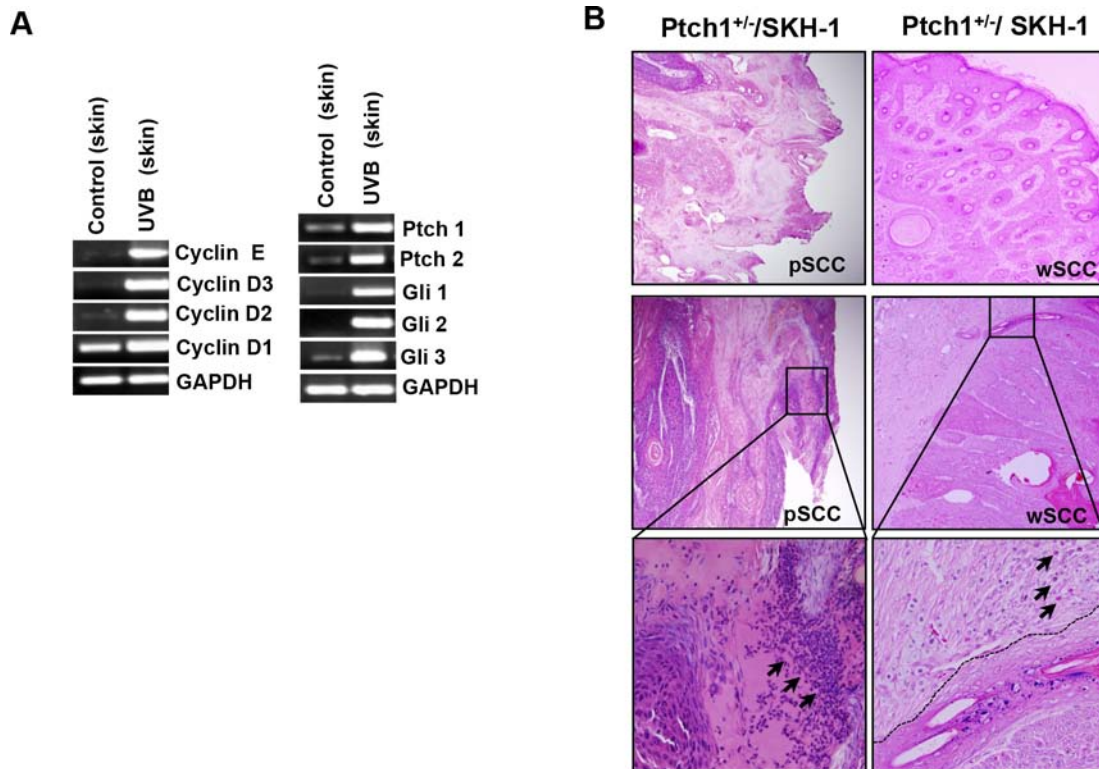

**Supplementary Figure S4: Up-regulation of cell cycle-regulatory proteins and Shh signaling molecules in tumor-adjacent skin of UVB-irradiated Ptch1<sup>+/-</sup>/SKH-1 mice.** **A.** Semi-quantitative PCR analysis showing expression of cell cycle and Shh regulatory components in the skin of Ptch1<sup>+/-</sup>/SKH-1 mice; **B.** Representative histology of identical tumors in Ptch1<sup>+/-</sup>/SKH-1 and Ptch1<sup>+/-</sup>/SKH-1 mice showing differential infiltration of inflammatory cells, and well-differentiated vs poorly-differentiated SCCs development (original magnification 10x). pSCC, poorly-differentiated SCC; wSCC, well-differentiated SCC.

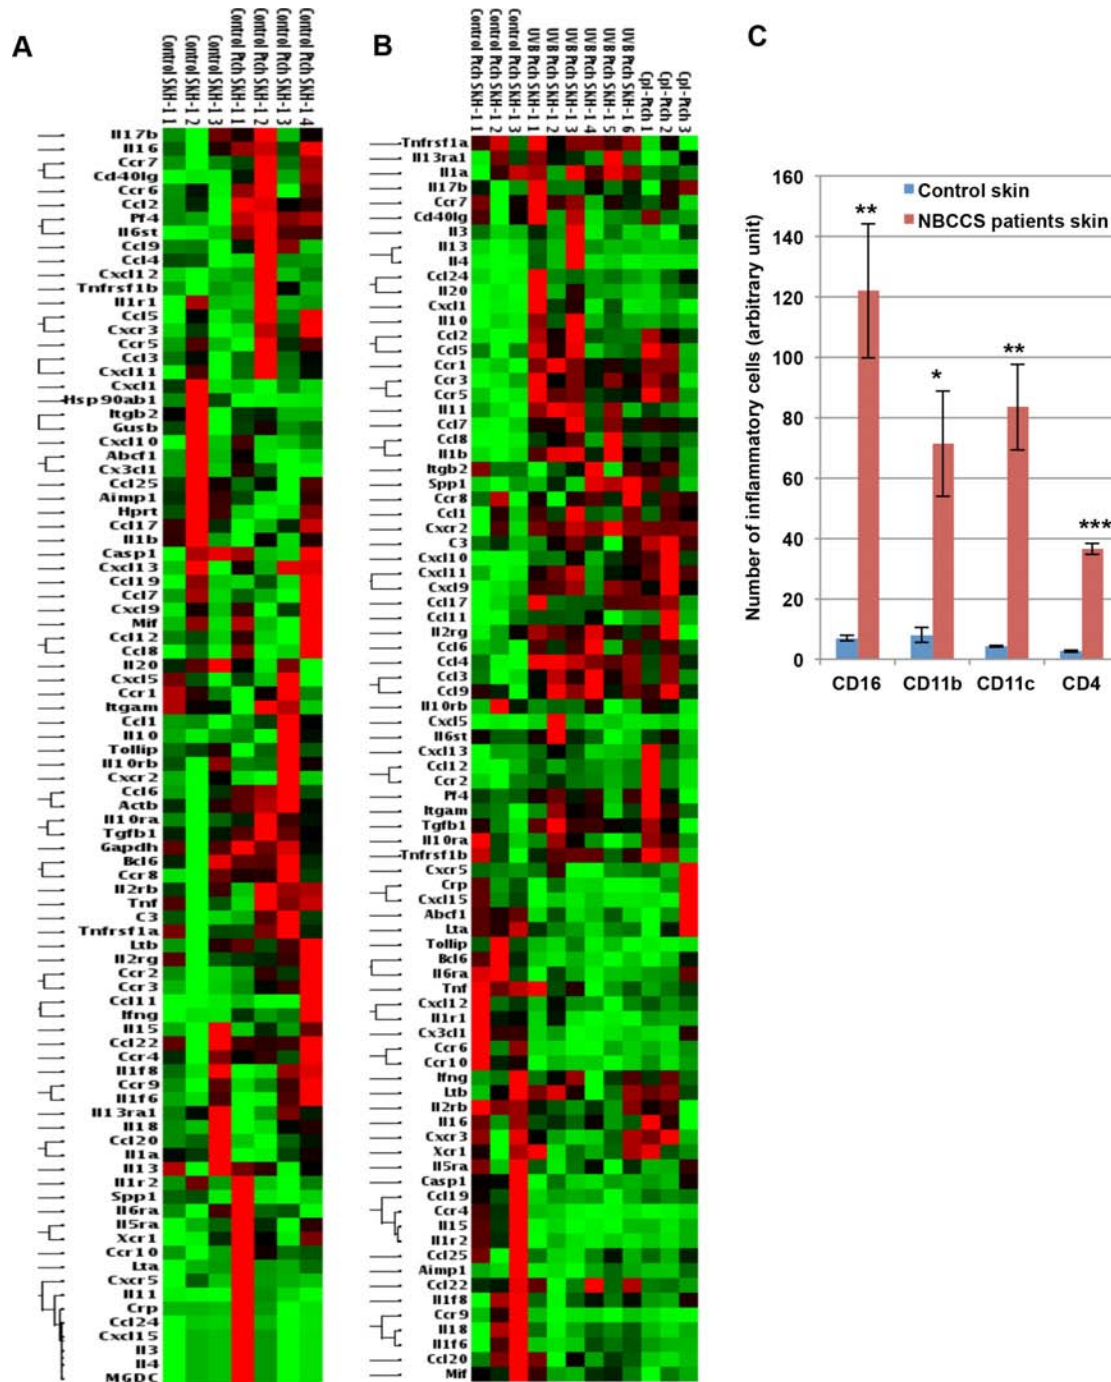

**Supplementary Figure S5: Heat map showing differential expression of inflammatory cytokines/ chemokines in the skin of *Ptch1*<sup>+/+</sup>/*SKH-1* and *Ptch1*<sup>+/-</sup>/*SKH-1* mice and microenvironment of BCCs from patients with NBCCS. A.** Baseline expression of inflammatory cytokines/chemokines genes in the skin of *Ptch1*<sup>+/+</sup>/*SKH-1* and *Ptch1*<sup>+/-</sup>/*SKH-1* mice at the age of 30 weeks; **B.** expression of inflammatory cytokines/chemokines genes in the skin of age-matched controls, UVB-irradiated and cyclopiamine+UVB-treated *Ptch1*<sup>+/-</sup>/*SKH-1* mice. **C.** Number of CD11b, CD16, CD11c and CD4-positive inflammatory cells in tumor microenvironment of skin of patients with NBCCS syndrome compared to normal human control skin. *P* values \**P*<0.05, \*\**P*<0.01, \*\*\**P*<0.001 show level of significance.

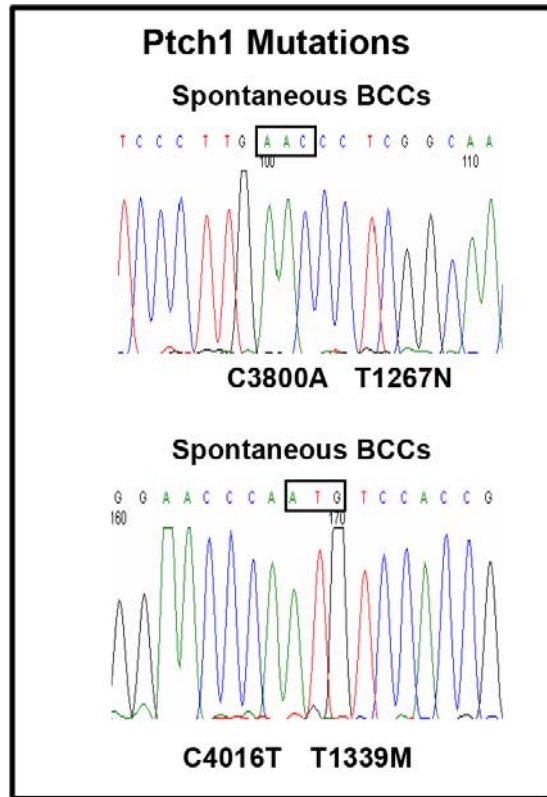

Supplementary Figure S6: Ptch1 gene mutations in spontaneous BCCs in Ptch1<sup>+/-</sup>/SKH-1 mice.

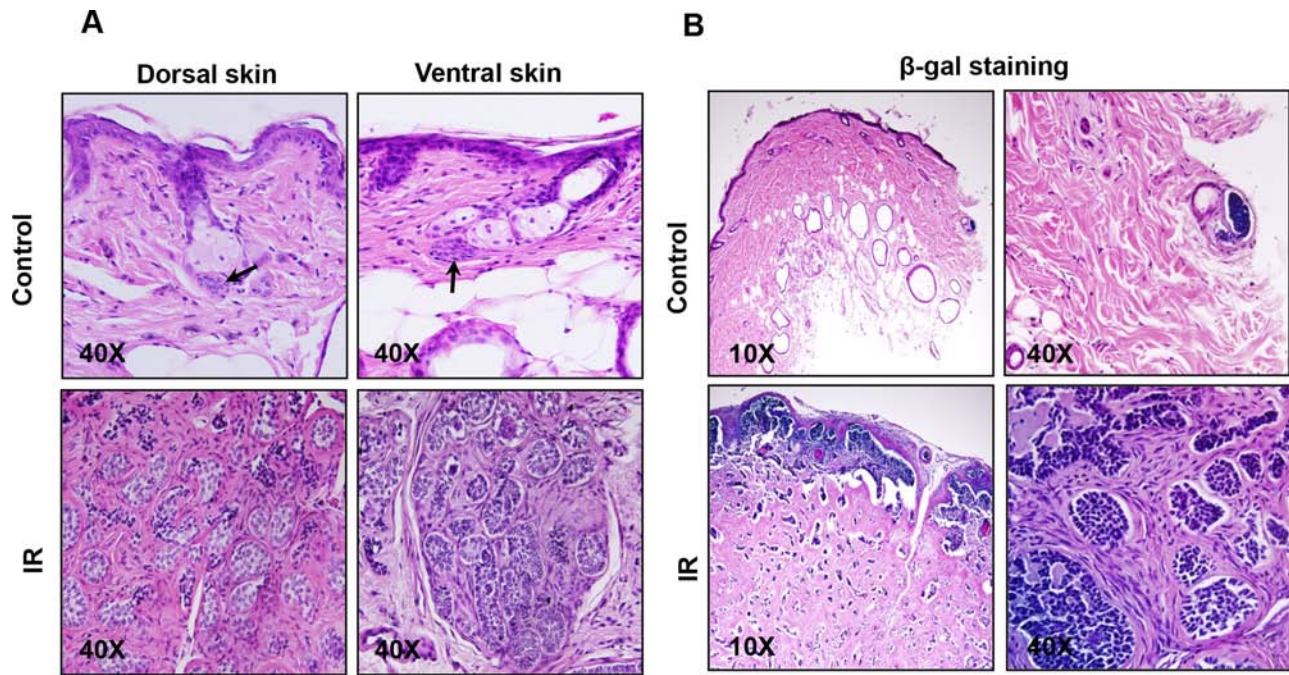

**Supplementary Figure S7: H&E and  $\beta$ -gal staining of microscopic BCCs induced in IR-irradiated  $Ptch1^{+/}$ /SKH-1 mice.**  $Ptch1^{+/}$ /SKH-1 mice were irradiated with a single dose of IR (5 Gy). IR irradiation induces multiple of BCCs on both dorsal and ventral skin. **A.** H&E staining and **B.**  $\beta$ -gal staining of IR-induced BCCs in  $Ptch1^{+/}$ /SKH-1 mice.

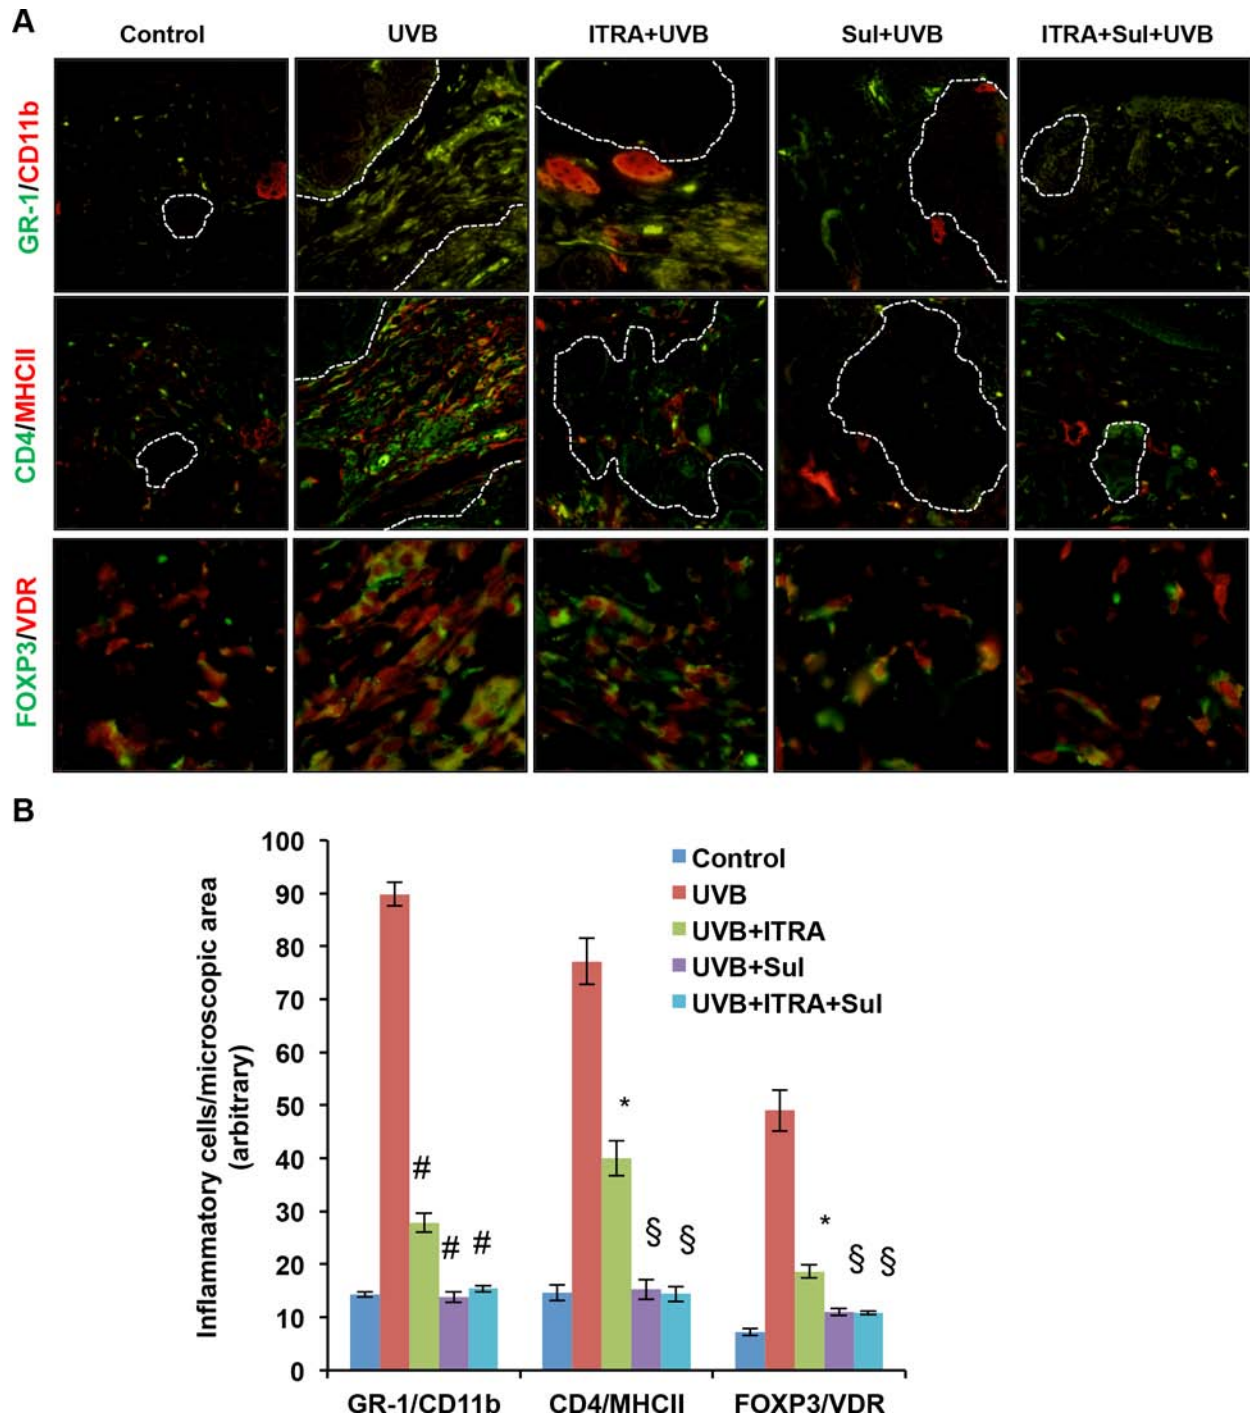

**Supplementary Figure S8: Effects of ITRA and Sul alone and in combination on infiltrating inflammatory cells in the skin and in the microenvironment of UVB-induced BCCs in *Ptch1<sup>+/-</sup>/SKH-1* mice.** Orally administered ITRA (40 mg/kg body weight) or topically administered Sul (80mg/kg body weight) alone or in combination were administered to UVB -irradiated (180 mJ/cm<sup>2</sup>) *Ptch<sup>+/-</sup>/SKH-1* mice, 30 min prior to irradiation for 30 weeks. Panel **A**, **B**. represent immunofluorescence staining (without DAPI) of GR-1 (green)/CD11b (red)-positive myeloid cells, CD4 (green)/MHCII (red)-positive T helper cells and FOXP3 (green)/ VDR (red)-positive regulatory T cells. *P* value \* $<0.05$ , § $<0.01$ , # $<0.001$



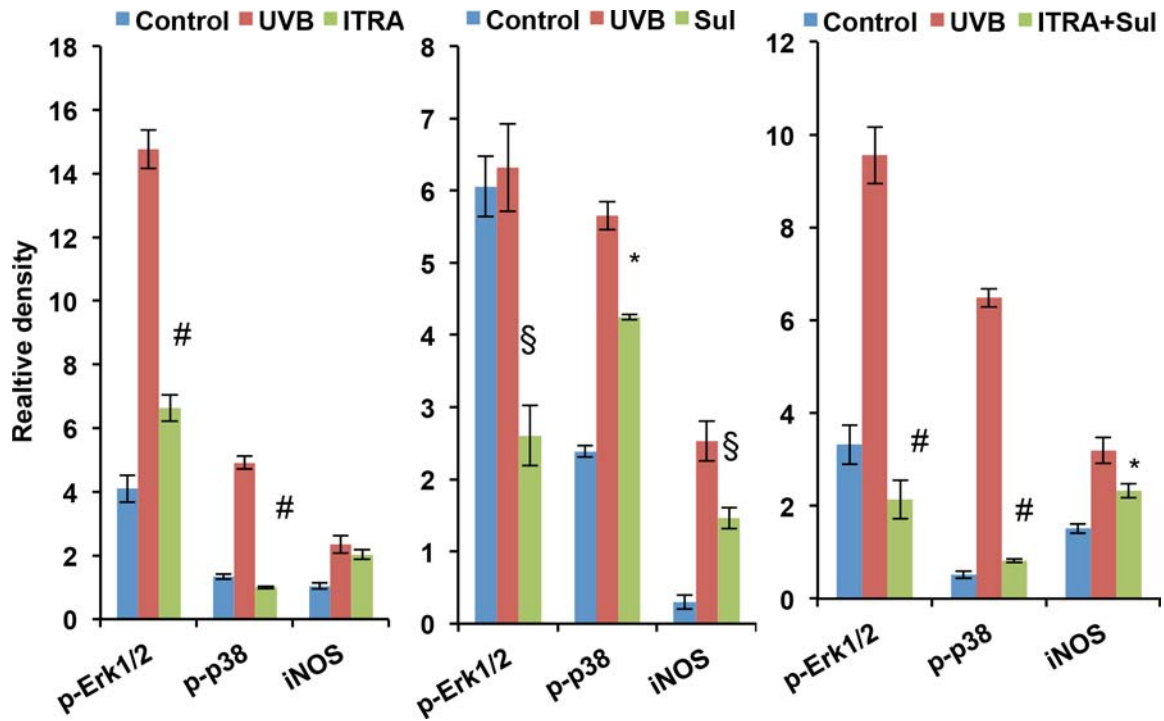

**Supplementary Figure S9: Effects of ITRA and Sul alone and in combination on inflammatory and proliferating biomarkers in skin of UVB-irradiated Ptch1<sup>+/+</sup>/SKH-1 mice.** Densitometric analysis of Erk1/2, p38, and iNOS expression in UVB-induced skin lesions in Ptch1<sup>+/+</sup>/SKH-1 mice. The combination of ITRA and Sul significantly diminished expression of these markers. *P* value \* $<0.05$ , § $<0.01$ , # $<0.001$ .

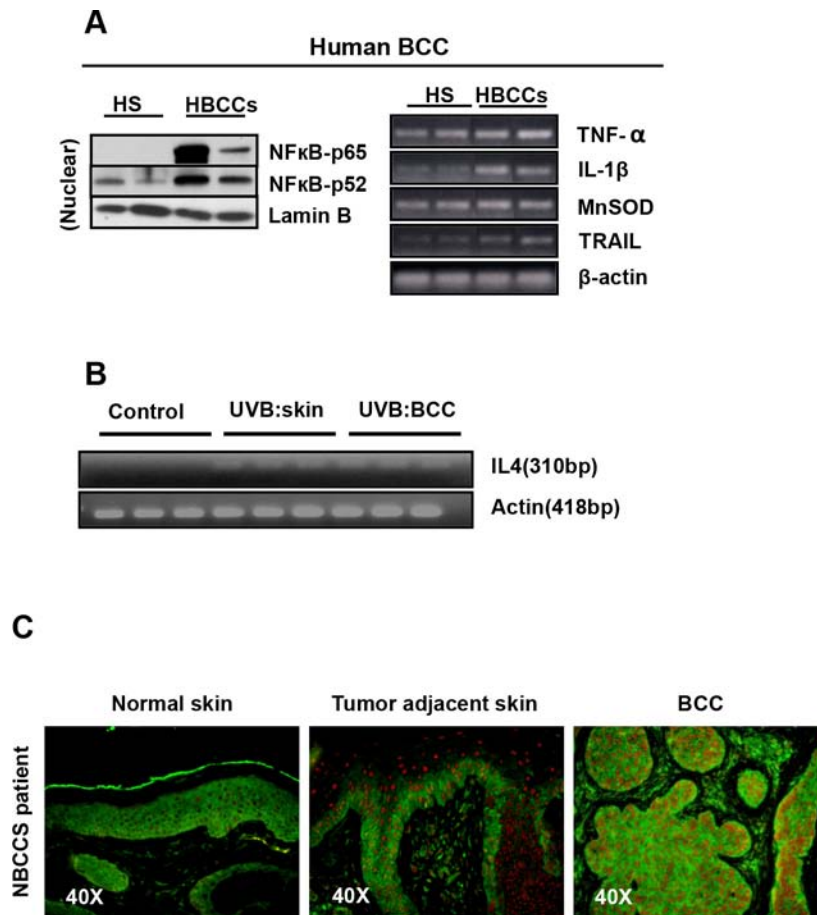

**Supplementary Figure S10: Expression of NFκB proteins and transcriptional targets of NFκB in human BCCs and murine BCCs.** **A.** Western blot analysis and semi-quantitative RT-PCR analysis of NFκB (NFκB-p65, NFκB-p52) and its transcriptional target genes TNF-α, IL-1β, MnSOD, and TRAIL in human BCCs (NE = nuclear extracts); **B.** Semi-quantitative RT-PCR analysis showing up-regulation of mRNA levels of IL4 in UVB-induced BCCs and tumor adjacent skin of *Ptch<sup>+/+</sup>/SKH-1* mice; **C.** Co-expression of Bcl3 and p50 in patients with NBCCS samples showing nuclear localization of these proteins.

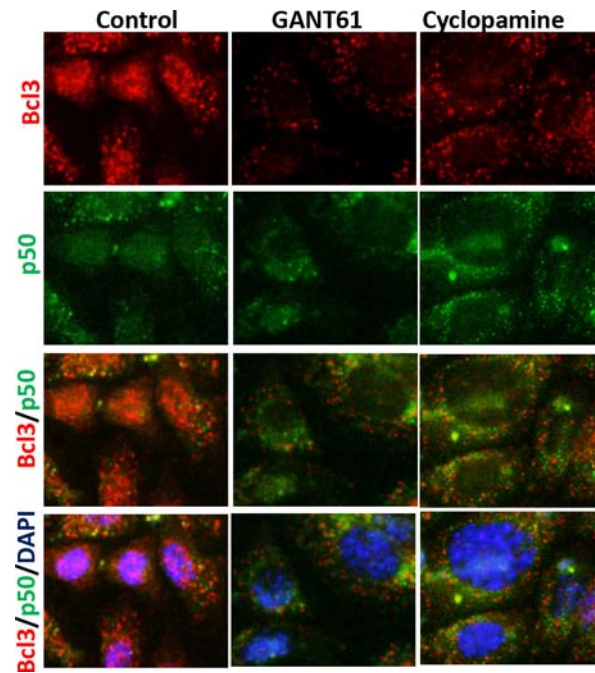

**Supplementary Figure S11: Shh inhibitors reduced the nuclear translocation of Bcl3/p50 complex in ASZ001 cell line.** ASZ cells were treated with GANT61 (10  $\mu$ M) and cyclopamine (5  $\mu$ M) in 154CF media supplemented with human keartinocyte and  $\text{CaCl}_2$  at 37°C for 24 h. ASZ001 cells were immunostained with Bcl3 and p50 antibodies.

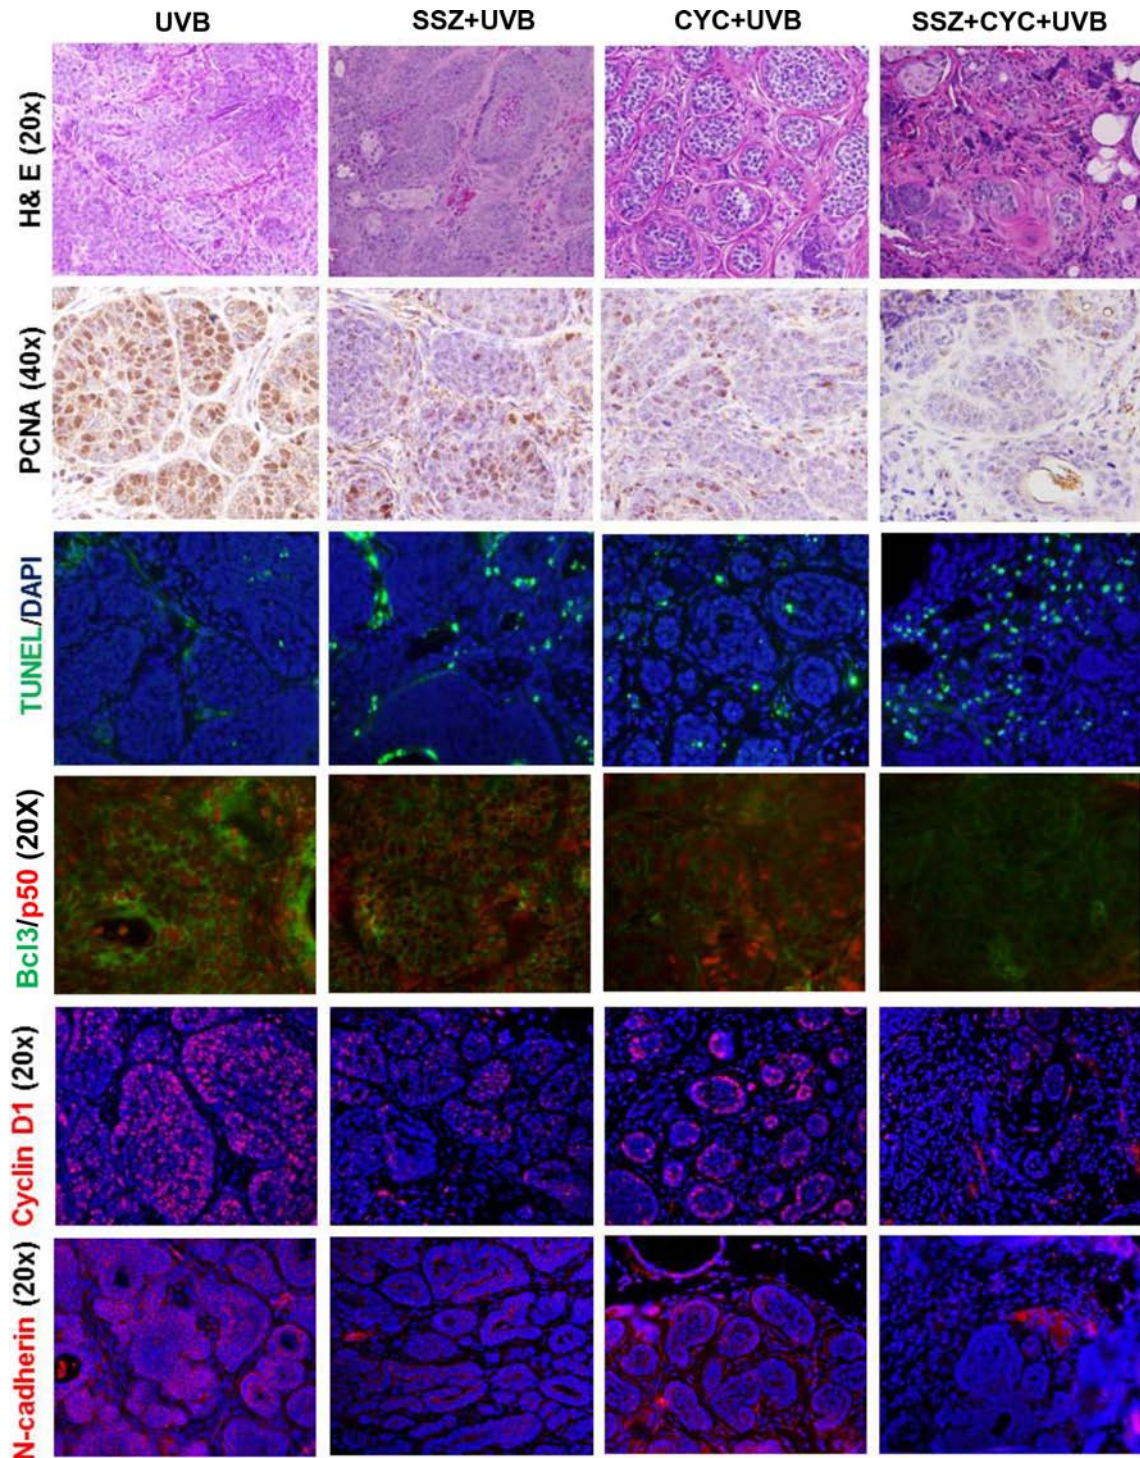

**Supplementary Figure S12: Effects of sulfasalazine (SSZ) and cyclopamine (CYC) alone and in combination on PCNA, apoptosis, Bcl3, p50, Cyclin D1 and N-cadherin in the UVB-induced BCCs in *Ptch1<sup>+/-</sup>/SKH-1* mice.** Orally administered SSZ (300 ppm in drinking water) or i.p. administered CYC (20mg/kg body weight) alone or in combination were administered to UVB -irradiated (180 mJ/cm<sup>2</sup>) *Ptch1<sup>+/-</sup>/SKH-1* mice, 30 min prior to irradiation for 30 weeks. Panel I represents H&E staining; panel II represents immunohistochemical staining of PCNA; panel III represents TUNEL-positive cells; panel IV showing immunofluorescence staining of Bcl3 (red) /NFκBp50 (green)-positive BCC cells; panel V showing immunofluorescence staining of cyclin D1 (red) with DAPI (blue); panel VI showing immunofluorescence staining of N-Cadherin (red) with DAPI (blue).

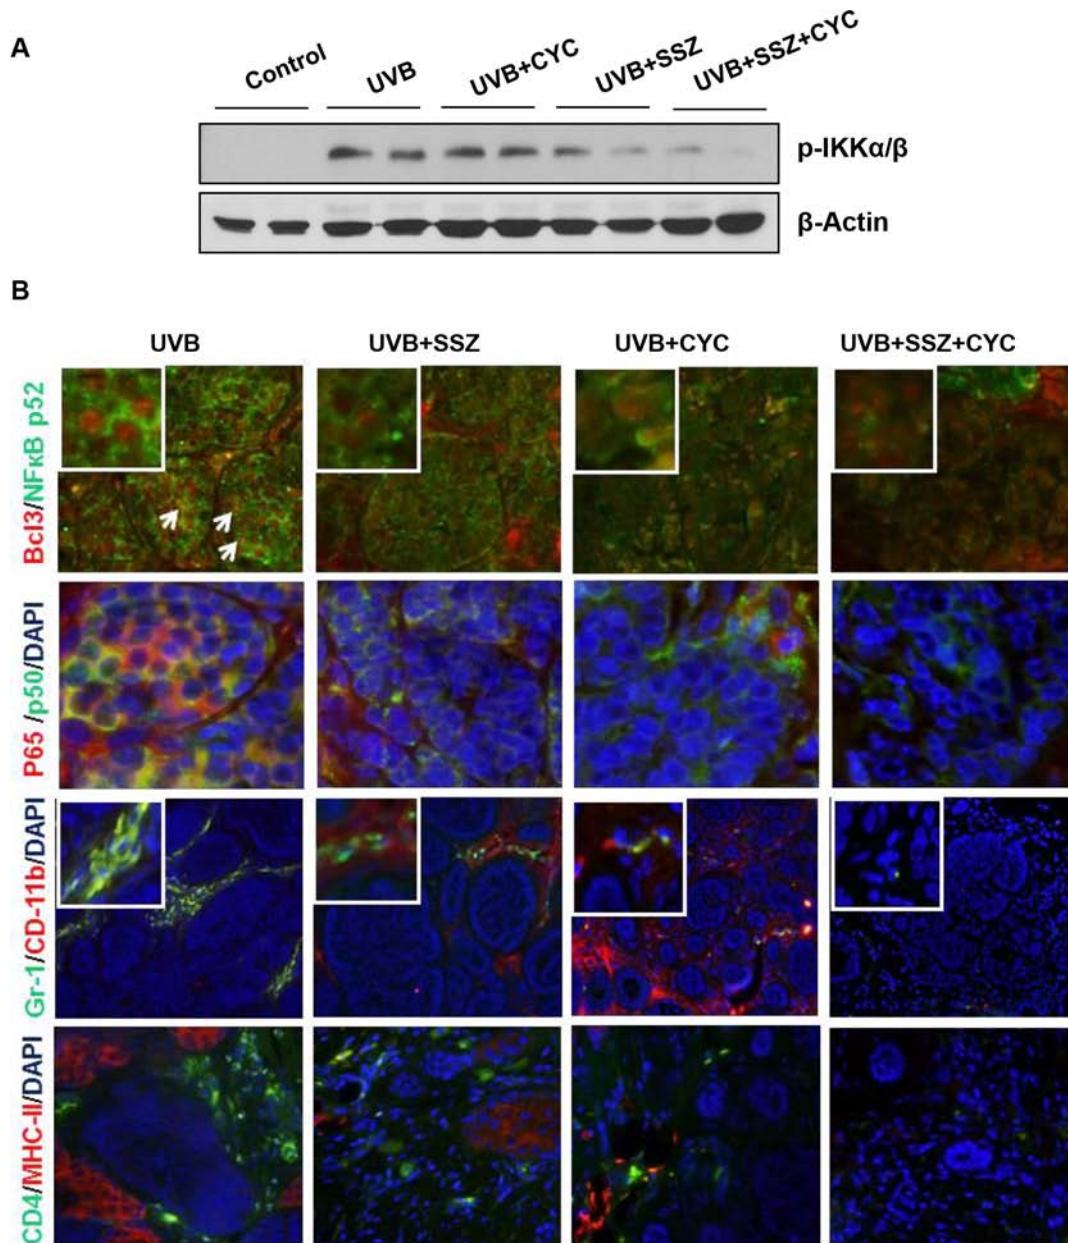

**Supplementary Figure S13: Effects of sulfasalazine (SSZ) and cyclopamine (CYC) alone and in combination on expression of Bcl3/p52, p65/p50 and on infiltrating inflammatory cells in the skin and in the microenvironment of UVB-induced BCCs in *Ptch1<sup>+/-</sup>/SKH-1* mice.** Orally administered SSZ (300 ppm in drinking water) or i.p. administered CYC (20 mg/kg body weight) alone or in combination were administered to UVB-irradiated (180 mJ/cm<sup>2</sup>) *Ptch1<sup>+/-</sup>/SKH-1* mice, 30 min prior to irradiation for 30 weeks. **A.** Western blot analysis of p-IKK $\alpha/\beta$  in skin tissues treated with SSZ and CYC alone and in combination. Panel I represents immunofluorescence staining of Bcl3 (red) and NF $\kappa$ Bp52 (green); panel II represents immunofluorescence staining of p65 (red), p50 (green) and DAPI (blue); panel III represent immunofluorescence staining GR-1 (green)/CD11b (red)-positive myeloid cells, CD4 (green)/MHCII (red)-positive T helper cells.
